# Supplementary material for: Hierarchical Fe2O3@CNF fabric decorated with MoS2 nanosheets as a robust anode for flexible lithium-ion batteries exhibiting ultrahigh areal capacity
Source: Royal Society of Chemistry journal article supplement (doi:10.1039/c8ta04341h), 2018-01-01
Supplement: c8ta04341h1.pdf [file c8ta04341h1.pdf]

## Supporting Information

### **Hierarchical Fe<sub>2</sub>O<sub>3</sub>@CNF Fabric Decorated with MoS<sub>2</sub> Nanosheets as Robust Anode for Flexible Lithium-ion Battery Exhibiting Ultrahigh Areal Capacity**

*Xueyan Huang,<sup>a</sup> Xin Cai,<sup>a</sup> Donghui Xu,<sup>a</sup> Wenyan Chen,<sup>a</sup> Shuanjin Wang,<sup>b</sup> Wuyi*

*Zhou,<sup>a</sup> Yuezhong Meng,<sup>b</sup> Yueping Fang,<sup>a</sup> and Xiaoyuan Yu<sup>a\*</sup>*

<sup>a</sup>College of Materials and Energy, South China Agricultural University, Guangzhou 510642, PR China. E-mail: [yuxiaoyuan@scau.edu.cn](mailto:yuxiaoyuan@scau.edu.cn).

<sup>b</sup>Key Laboratory of Low-carbon Chemistry and Energy Conservation of Guangdong Province/State Key Laboratory of Optoelectronic Materials and Technologies, School of Materials Science and Engineering, Sun Yat-sen University, Guangzhou 510275, PR China.

**Keywords:** Flexible lithium-ion battery, MoS<sub>2</sub>, Fe<sub>2</sub>O<sub>3</sub>@CNFs, High capacity anode

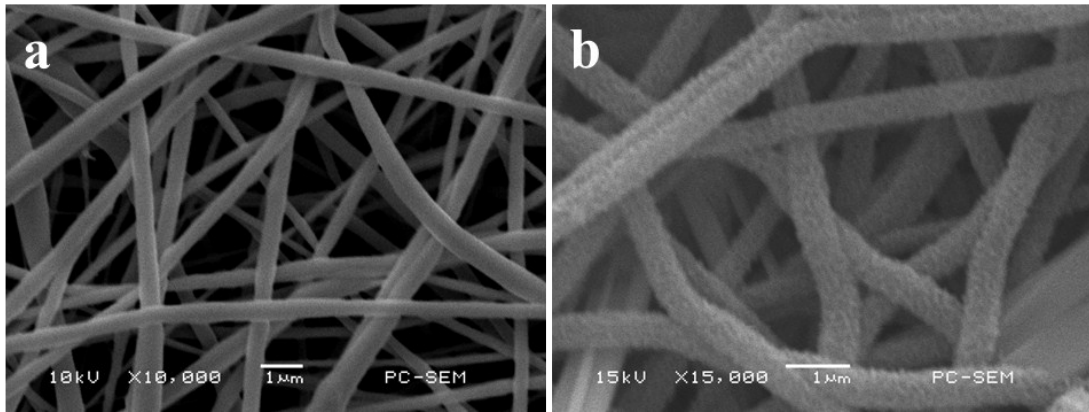

**Fig. S1.** The SEM images of (a) CNF and (b) CNF@MoS<sub>2</sub>

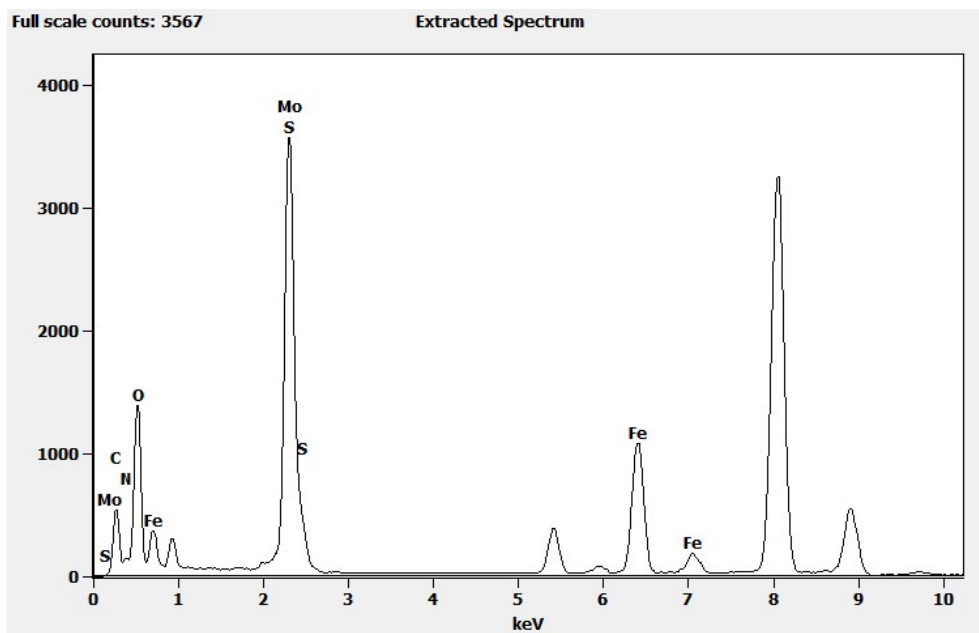

**Fig. S2.** The energy-dispersive X-ray spectroscopy (EDX) spectrum of various elements for  $\text{Fe}_2\text{O}_3@\text{CNFs}@\text{MoS}_2$

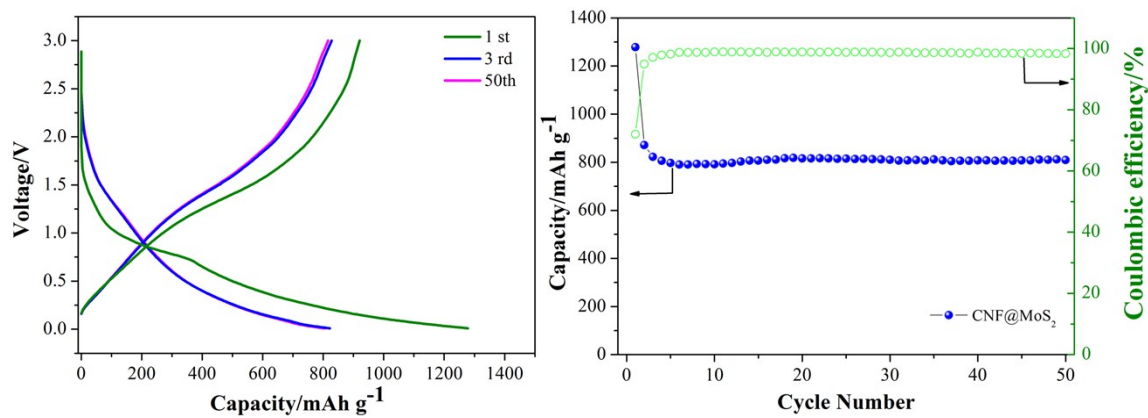

**Fig. S3.** (a) The charge–discharge curves of CNF@MoS<sub>2</sub> at a current density of 0.2 A g<sup>-1</sup> and (b) cycling performance and coulombic efficiency of CNF@MoS<sub>2</sub> at a current density of 0.2 A g<sup>-1</sup>.

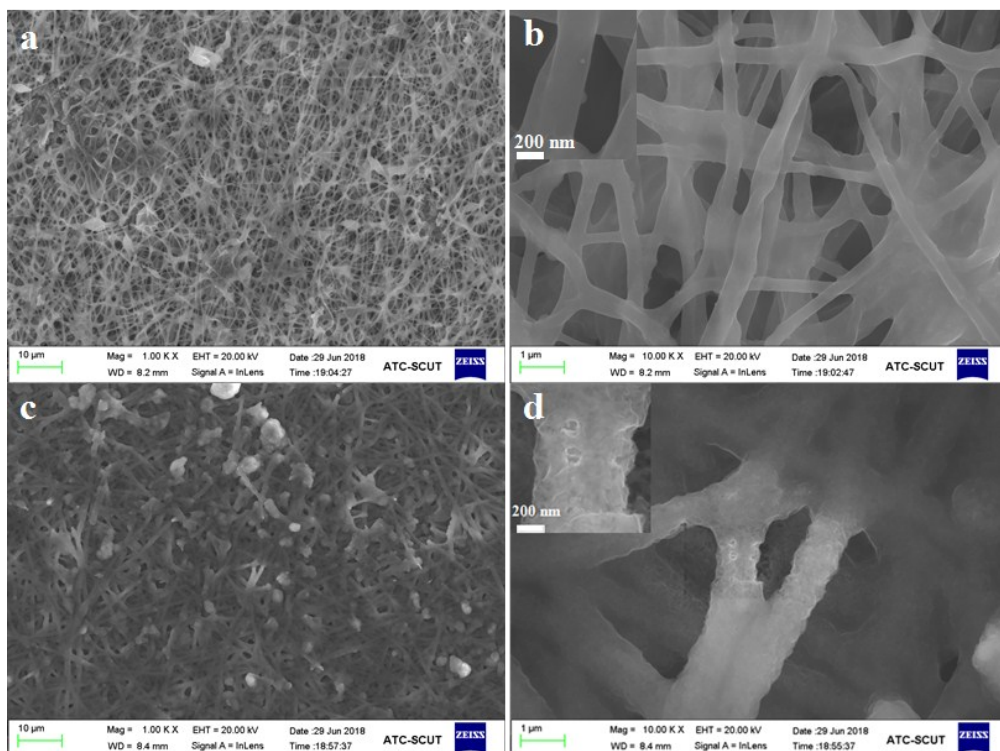

**Fig. S4.** SEM images for (a-b)  $\text{Fe}_2\text{O}_3@\text{CNFs}$  and (c-d)  $\text{Fe}_2\text{O}_3@\text{CNFs}@\text{MoS}_2$  fabric electrode after 50 cycles.

**Table S1.** The quantitative results of various elements for Fe<sub>2</sub>O<sub>3</sub>@CNFs@MoS<sub>2</sub>

| Element Line | Net Counts | Weight % | Atom % |
|--------------|------------|----------|--------|
| <i>C K</i>   | 3772       | 12.38    | 30.95  |
| <i>N K</i>   | 1431       | 2.96     | 6.34   |
| <i>O K</i>   | 10640      | 12.27    | 23.04  |
| <i>S K</i>   | 31798      | 21.94    | 20.55  |
| <i>Fe K</i>  | 17966      | 14.71    | 7.91   |
| <i>Mo K</i>  | 11369      | 35.74    | 11.19  |
| <i>Total</i> |            | 100.00   | 100.00 |

**Table S2.** Comparison of electrochemical performance of similar materials which were reported previously

| Materials                                             | 1 <sup>st</sup> capacity<br>(mAh g <sup>-1</sup> /mA g <sup>-1</sup> ) | Cycle capacity<br>(mAh g <sup>-1</sup> /cycles/mA g <sup>-1</sup> ) | Rate Capacity<br>(mAh g <sup>-1</sup> /cycles/mA g <sup>-1</sup> ) | Electrode | reference |
|-------------------------------------------------------|------------------------------------------------------------------------|---------------------------------------------------------------------|--------------------------------------------------------------------|-----------|-----------|
| $\gamma$ -Fe <sub>2</sub> O <sub>3</sub> @CNTs        | 1653.4/100                                                             | 860/400/500                                                         | 464.4/210/10000                                                    | Powder    | [1]       |
| Fe <sub>2</sub> O <sub>3</sub> -CNF                   | 1214/200                                                               | 820/100 /200                                                        | 262/65/5000                                                        | Flexible  | [2]       |
| Fe <sub>2</sub> O <sub>3</sub> -Carbon cloth          | 1300/200                                                               | 99/100/5000                                                         | 59/60/10000                                                        | Flexible  | [3]       |
| Fe <sub>2</sub> O <sub>3</sub> /CNFs                  | 1008/50                                                                | 488/75/50                                                           | 288/100/500                                                        | Flexible  | [4]       |
| CNFs@MoS <sub>2</sub>                                 | 1489/100                                                               | 688/300/1000                                                        | 864/60/5000                                                        | Powder    | [5]       |
| PCNF@MoS <sub>2</sub>                                 | 954/50                                                                 | 736/50/50                                                           | 532/25/1000                                                        | Flexible  | [6]       |
| MoS <sub>2</sub> -cBC                                 | 1313/100                                                               | 581/1000/1000                                                       | 267/50/4000                                                        | Flexible  | [7]       |
| MoS <sub>2</sub> -r-GO-PEO                            | 1240/100                                                               | 890/100/100                                                         | 600/40/1000                                                        | Flexible  | [8]       |
| CNF@MoS <sub>2</sub> -GO                              | 1225/200                                                               | 680/250/500                                                         | 780/32/2500                                                        | Flexible  | [9]       |
| MoS <sub>2</sub> /ACF cloth                           | 1262/200                                                               | 635/200/200                                                         | 441/45/1500                                                        | Flexible  | [10]      |
| Fe <sub>2</sub> O <sub>3</sub> @CNFs@MoS <sub>2</sub> | 1465/200                                                               | 938/300/200                                                         | 304/60/5000                                                        | Flexible  | This work |

## References

- [1] X. Lv, J. Deng, B. Wang, J. Zhong, T. Sham, X. Sun, X. Sun, *Chem. Mater.*, 2017, **29**, 3499-3506
- [2] X. Zhang, H. Liu, S. Petnikota, S. Ramakrishna, H.J. Fan, *J. Mater. Chem. A*, 2014, **2**, 10835-10841.
- [3] M. Balogun, Z. Wu, Y. Luo, W. Qiu, X. Fan, B. Long, M. Huang, P. Liu, Y. Tong, *J. Power Sources*, 2014, **308**, 7-17.
- [4] L. Ji, O. Toprakci, M. Alcoutlabi, Y. Yao, Y. Li, S. Zhang, B. Guo, Z. Lin, X. Zhang, *Acs Appl. Mater. Interfaces*, 2012, **4**, 2672–2679.
- [5] F. Zhou, S. Xin, H. Liang, L. Song, S. Yu, *Angew. Chem. Int. Edit.*, 2014, **53**, 11552–11556.
- [6] S. Hu, W. Chen, J. Zhou, F. Yin, E. Uchaker, Q. Zhang, G. Cao, *J. Mater. Chem. A*, 2014, **2**, 7862-7872.
- [7] F. Zhang, Y. Tang, Y. Yang, X. Zhang, C. Lee, *Electrochim. Acta*, 2016, **211**, 404-410.
- [8] Y. Liu, X. Zhu, Z. Duan, X. Xie, *Chem. Commun.*, 2013, **49**, 10305-10307.
- [9] F. Xiong, Z. Cai, L. Qu, P. Zhang, Z. Yuan, O. Asare, W. Xu, C. Lin, L. Mai. *Acs Appl. Mater. Interfaces*, 2015, **7**, 12625–12630.
- [10] C. Wang, W. Wan, Y. Huang, J. Chen, H. Zhou, X. Zhang, *Nanoscale*, 2014, **6**, 5351–5358.
